# Supplementary material
Source: publisher figshare collection journal article supplement (https://sage.figshare.com/ndownloader/files/13894436)
Supplement: Supplementary file 1 [file 13894436]

Supplemental Table 14. Zero-order correlations between key variables from Study 6. PANAS = Positive Affect Negative Affect Schedule, VDAT = Voodoo Doll Aggression Task. Gender is coded: male = 1, female = -1. 'Pre', 'During', and 'Post' refer to before, during, and after participants completed the aggression measure, respectively. \* $p < .05$ , \*\* $p < .01$ , \*\*\* $p < .001$

|                                     | 1      | 2      | 3      | 4      | 5      | 6      | 7    | 8     |
|-------------------------------------|--------|--------|--------|--------|--------|--------|------|-------|
| 1. Gender                           |        |        |        |        |        |        |      |       |
| 2. PANAS - Negative Affect (Pre)    | .01    |        |        |        |        |        |      |       |
| 3. PANAS - Positive Affect (Pre)    | .25*** | -.10   |        |        |        |        |      |       |
| 4. PANAS - Negative Affect (During) | -.06   | .35*** | .10    |        |        |        |      |       |
| 5. PANAS - Positive Affect (During) | .14*   | .14*   | .35*** | .09    |        |        |      |       |
| 6. PANAS - Negative Affect (Post)   | .06    | .80*** | -.07   | .48*** | .13*   |        |      |       |
| 7. PANAS - Positive Affect (Post)   | .21**  | -.13*  | .82*** | .08    | .38*** | -.10   |      |       |
| 8. Short Sadistic Impulse Scale     | .31*** | .27*** | .03    | .09    | .18**  | .31*** | .01  |       |
| 9. VDAT (Log Transformed)           | .04    | .12    | .02    | .19**  | .25*** | .10    | -.02 | .21** |
